# Supplementary material for: Macrophage alternative activation confers protection against lipotoxicity-induced cell death
Source: PubMed Central journal article supplement — Mol Metab. 2017 Aug 7;6(10):1186–97. doi: 10.1016/j.molmet.2017.08.001 (PMC5641682; doi:10.1016/j.molmet.2017.08.001), 2017-08-07
Supplement: mmc1.pdf [file mmc1.pdf]

**Online Supplementary Material**

**Macrophage alternative activation confers protection against lipotoxicity-induced cell  
death**

Lingling Dai, Prerna Bhargava, Kristopher J. Stanya, Ryan Kendall Alexander, Yae-Huei Liou,  
David Jacobi, Nelson Howard Knudsen, Alexander Hyde, Matthew R. Gangl, Sihao Liu and  
Chih-Hao Lee

**Table S4. Top 10 DAVID functional annotation clustering analyses of genes significantly altered by GW501516 treatment as compared to vehicle**

| Ranking | Enrichment Score | Category      | Term                                                                    | PValue | Genes                                                                                                                                                                                                                                                                                                                                                                                                                                                                                                      |
|---------|------------------|---------------|-------------------------------------------------------------------------|--------|------------------------------------------------------------------------------------------------------------------------------------------------------------------------------------------------------------------------------------------------------------------------------------------------------------------------------------------------------------------------------------------------------------------------------------------------------------------------------------------------------------|
| 1       | 3.1979           | GOTERM_BP_FAT | GO:0016064~immunoglobulin mediated immune response                      | 0.0003 | Bcl3,CD74,Msh2,NOD2,PRKCD,C1qa,C1QB,C1QC,C1RL,C3,C4bp,Fcgr2b,H2-Ea,Igh-6,IRF7,LOC100048401,masp2,Pou2f2                                                                                                                                                                                                                                                                                                                                                                                                    |
| 2       | 1.8773           | GOTERM_BP_FAT | GO:0042981~regulation of apoptosis                                      | 0.0105 | Bcl3,CD74,Msh2,NOD2,PRKCD,1110007C09Rik,2810002N01Rik,ADRB2,ALOX12,ANGPTL4,ATM,BCL2,BCL2L11,BCL2L13,BCLAF1,birc2,BIRC3,birc6,BTG2,Camk1d,CARD9,Casp9,Cd24a,CIAPIN1,DAPK1,ddx20,Diablo,ERN1,GCH1,HIP1,HTT,Id3,IFIH1,ITSN1,KLF10,LOC100044206,LOC100048845,Lst1,LTB,MADD,MBD4,NF1,nfkbil1,NIACR1,Nlrp12,NR3C1,NR4A2,nrp,NTF3,NTRK1,PGAP2,PIK3CA,PIK3CG,PML,PRDX2,PRKDC,Prnd,Rarb,rarg,RIPK2,SERPINB9,SGK3,sgms1,Skil,Skp2,SP110,Spn,STAT5A,STK17B,tgfb1,tgm2,TNFSF13B,Trp53inp1,TSC22D3,VEGFA,XIAP,xpa,XRCC2 |
| 3       | 1.5521           | GOTERM_BP_FAT | GO:0043065~positive regulation of apoptosis                             | 0.0251 | Bcl3,PRKCD,2810002N01Rik,ADRB2,ATM,BCL2L11,BCLAF1,Casp9,Cd24a,DAPK1,ddx20,Diablo,ERN1,GCH1,Id3,KLF10,LOC100044206,LOC100048845,Lst1,LTB,MBD4,NF1,nfkbil1,NIACR1,NR3C1,PML,PRKDC,Rarb,rarg,RIPK2,Skp2,SP110,Spn,STK17B,tgfb1,tgm2,Trp53inp1,xpa                                                                                                                                                                                                                                                             |
| 4       | 1.4542           | GOTERM_BP_FAT | GO:0046651~lymphocyte proliferation                                     | 0.0321 | PRKCD,RIPK2,BCL2,PRDX2,CD86,CRIP3,CXCR4,SHB,Vpreb2,Zbtb32                                                                                                                                                                                                                                                                                                                                                                                                                                                  |
| 5       | 1.2222           | GOTERM_BP_FAT | GO:0045414~regulation of interleukin-8 biosynthetic process             | 0.0599 | Apoa2,TLR7,TLR8                                                                                                                                                                                                                                                                                                                                                                                                                                                                                            |
| 6       | 1.1397           | GOTERM_BP_FAT | GO:0006779~porphyrin biosynthetic process                               | 0.0373 | ank1,FECH,HMBS,Spnb1,Urod,UROS                                                                                                                                                                                                                                                                                                                                                                                                                                                                             |
| 7       | 0.9784           | GOTERM_BP_FAT | GO:0045625~regulation of T-helper 1 cell differentiation                | 0.0599 | RIPK2,hlx,Il4ra                                                                                                                                                                                                                                                                                                                                                                                                                                                                                            |
| 8       | 0.9670           | GOTERM_BP_FAT | GO:0051250~negative regulation of lymphocyte activation                 | 0.1015 | hlx,Il4ra,PRDX2,Cd24a,Lst1,Spn,CD74,Fcgr2b,pAG1,TNFRSF14                                                                                                                                                                                                                                                                                                                                                                                                                                                   |
| 9       | 0.9522           | GOTERM_BP_FAT | GO:0045356~positive regulation of interferon-alpha biosynthetic process | 0.0599 | TLR7,TLR8,TLR3                                                                                                                                                                                                                                                                                                                                                                                                                                                                                             |
| 10      | 0.8558           | GOTERM_BP_FAT | GO:0046460~neutral lipid biosynthetic process                           | 0.1311 | AGPAT9,Ang,MOGAT1,PCK1                                                                                                                                                                                                                                                                                                                                                                                                                                                                                     |

**Table S5. Top 10 DAVID functional annotation clustering analyses of genes significantly altered by Il-4 treatment as compared to vehicle**

| Ranking | Enrichment Score | Category      | Term                                                                               | PValue | Genes                                                                                                                                                                                                                                                                                                                                                                                                                                                                                    |
|---------|------------------|---------------|------------------------------------------------------------------------------------|--------|------------------------------------------------------------------------------------------------------------------------------------------------------------------------------------------------------------------------------------------------------------------------------------------------------------------------------------------------------------------------------------------------------------------------------------------------------------------------------------------|
| 1       | 4.5287           | GOTERM_BP_FAT | GO:0002495~antigen processing and presentation of peptide antigen via MHC class II | 0.0000 | H2-EA, RMCS2, FCGR2B, H2-EB1, UNC93B1, H2-DMB1, H2-DMA, CD74, H2-DMB2                                                                                                                                                                                                                                                                                                                                                                                                                    |
| 2       | 3.4713           | GOTERM_BP_FAT | GO:0051250~negative regulation of lymphocyte activation                            | 0.0003 | LST1, NFKBID, ERBB2, IL4RA, TNFRSF14, FOXP3, CD24A, CD74, PDCD1LG2, TIGIT, IL20RB, FCGR2B, HLX, PAG1                                                                                                                                                                                                                                                                                                                                                                                     |
| 3       | 2.4817           | GOTERM_BP_FAT | GO:0042981~regulation of apoptosis                                                 | 0.0026 | IGH-1B, STAT5B, INTS1, SGMS1, ITSN1, CIAPIN1, CASP6, PAK7, NOD2, CASP9, ANK2, CUL7, RARB, LTB, RARG, MADD, ARHGEF7, PIM1, BCL2L13, NLRP3, BCL2L11, BCL2L10, XPA, CARD14, ADRB2, PSEN2, MAPK9, GHRL, ALOX12, TRAF1, ING4, CDK5R1, LST1, TNF, NFKBID, STK17B, PRKDC, SP110, CX3CL1, CD24A, CD74, BCL2, TGM2, BMF, CD27, PIK3R1, ANGPTL4, COL18A1, CARD9, NTF3, HTT, TGFBR1, NF1, NR4A2, CIDEB, IGF1, 2810002N01RIK, HGF, GAS1, ATM, NFKBIL1, FCGR3, PLEKHF1, NOTCH1, APBB3, SYNGAP1, APBB1 |
| 4       | 2.1631           | GOTERM_BP_FAT | GO:0043065~positive regulation of apoptosis                                        | 0.0061 | ING4, CDK5R1, LST1, TNF, NFKBID, IGH-1B, STK17B, PRKDC, SP110, CD24A, CASP6, CASP9, TGM2, RARB, LTB, CD27, COL18A1, RARG, ARHGEF7, TGFBR1, NF1, CIDEB, 2810002N01RIK, ATM, BCL2L11, NFKBIL1, FCGR3, PLEKHF1, XPA, ADRB2, NOTCH1, PSEN2, MAPK9, APBB1                                                                                                                                                                                                                                     |
| 5       | 1.7643           | GOTERM_BP_FAT | GO:0051251~positive regulation of lymphocyte activation                            | 0.0121 | H2-EA, ICOSL, IGH-1B, IL4RA, STAT5B, TNFRSF13C, TNFSF14, SYKB, FOXP3, CD24A, PDCD1LG2, CD74, CD83, HLX, H2-DMA, CD27                                                                                                                                                                                                                                                                                                                                                                     |
| 6       | 1.7351           | GOTERM_BP_FAT | GO:0030335~positive regulation of cell migration                                   | 0.0108 | COL18A1, LOC100045000, PRR5, BCL2, LAMB1-1, HBEGF, ZFP640, PIK3R1, PRL2C2                                                                                                                                                                                                                                                                                                                                                                                                                |
| 7       | 1.6741           | GOTERM_BP_FAT | GO:0051085~chaperone mediated protein folding requiring cofactor                   | 0.0145 | TOR2A, H2-DMB1, H2-DMA, CD74, H2-DMB2                                                                                                                                                                                                                                                                                                                                                                                                                                                    |
| 8       | 1.6011           | GOTERM_BP_FAT | GO:0032945~negative regulation of mononuclear cell proliferation                   | 0.0251 | LST1, IL20RB, FCGR2B, ERBB2, TNFRSF14, FOXP3, CD24A, PDCD1LG2                                                                                                                                                                                                                                                                                                                                                                                                                            |
| 9       | 1.3782           | GOTERM_BP_FAT | GO:0046456~icosanoid biosynthetic process                                          | 0.0228 | PTGS1, SYKB, ALOX5, LTC4S, 201011101RIK, CD74, ALOX12                                                                                                                                                                                                                                                                                                                                                                                                                                    |
| 10      | 1.3449           | GOTERM_BP_FAT | GO:0051953~negative regulation of amine transport                                  | 0.0099 | TNF, LST1, LTB, NFKBIL1                                                                                                                                                                                                                                                                                                                                                                                                                                                                  |

**Table S6. List of primers used for qPCR**

| Genes         | Forward Sequence                   | Reverse Sequence               | Accession Number |
|---------------|------------------------------------|--------------------------------|------------------|
| Plin2         | GACCTTGTGTCCTCCGCTT<br>AT          | CAACCGCAATTTGTGGCT<br>C        | NM_007408        |
| Angptl4       | CATCCTGGGACGAGATGA<br>ACT          | TGACAAGCGTTACCACA<br>GGC       | NM_020581        |
| Sgms1         | CCAGGACTTAATCAACCT<br>AACCC        | GTCAGAGGAGACTCGGT<br>ACAG      | NM_001168525     |
| Nlrp3         | TCCTGCAGAGCCTACAGT<br>TGGGT        | GGTGGTCCTGCTTCCACG<br>CC       | NM_145827        |
| Mgl1          | TGAGAAAGGCTTTAAGAA<br>CTGGG        | GACCACCTGTAGTGATGT<br>GGG      | NM_001204252     |
| Igf1          | TGCTGTGTAAACGACCCG<br>GACC         | GGTGAGCAAGCAGAGCG<br>CCA       | NM_001111274     |
| Bcl2          | ATGCCTTTGTGGAACAT<br>ATGGC         | GGTATGCACCCAGAGTG<br>ATGC      | NM_177410        |
| Tnf- $\alpha$ | AAATGGCCTCCCTCTCAT<br>CAG          | GTCACTCGAATTTTGAGA<br>AGATGATC | NM_013693        |
| Il-1 $\beta$  | AATCTATACCTGTCCTGT<br>GTAATGAAAGAC | GGTATTGCTTGGGATCCA<br>CACT     | NM_008361        |
| Arg1          | CACAGTCTGGCAGTTGGA<br>AG           | GGGAGTGTTGATGTCAGT<br>GTG      | NM_007482        |
| Ym1           | AGAAGGGAGTTTCAAACC<br>TGGT         | GTCTTGCTCATGTGTGTA<br>AGTGA    | NM_009892        |
| Acadv1        | TCGGAGGCGGCCTGGAAA<br>GT           | TGCCAGCCCAGTGAGTT<br>CCT       | NM_017366        |
| Cd36          | GATGTGGAACCCATAACT<br>GGATTCAC     | GGTCCCAGTCTCATTAG<br>CCACAGTA  | NM_001159556     |
| Slc25a2<br>0  | ACTGCACCTCCTGGAAAA<br>TATCC        | TCTTCTCGGATCAGCTCT<br>CTCAAC   | NM_020520        |
| Mogat1        | TCCCGTTGTTCCGAGAAT<br>ATCT         | TGCTCAGCACATGAGAC<br>AAAC      | NM_026713        |
| H2-Eb1        | CCTGCAGCATGGTGTGGC<br>TCC          | CGCGCTGCGTCCC GTTGT<br>AG      | NM_010382        |

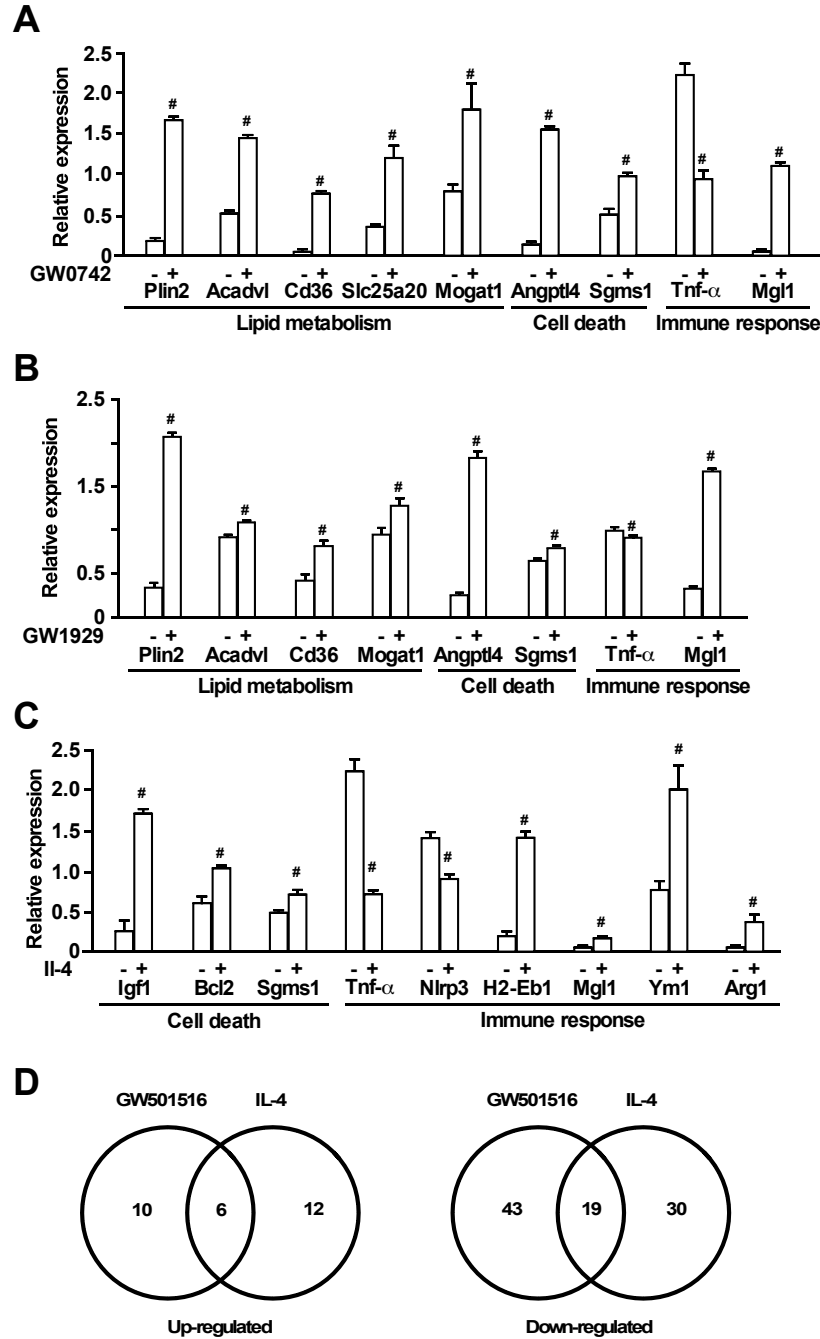

**Figure S1. Validation of Ppar $\delta$ /Ppar $\gamma$  and Stat6 target genes in RAW264.7 macrophages.**

(A) Validation of Ppar target genes identified by microarray in RAW-Ppar $\delta$  cells cultured with GW0742 (0.1 $\mu$ M) overnight. Vehicle (DMSO) was included as a control. Gene expression was determined by qPCR. (B) Gene expression in Ppar $\gamma$ -overexpressing RAW264.7 cells treated with Ppar $\gamma$  agonist GW1929 (1  $\mu$ M) overnight. (C) Validation of Il4-regulated genes identified by microarray in RAW-Ppar $\delta$  cells treated with rIl-4 (10 ng/ml) overnight. (D) Venn diagrams of cell-death related genes significantly up-regulated or down-regulated by GW501516 or Il-4 treatment, compared to vehicle control. Data were presented as means  $\pm$  SEM. #p < 0.05 between vehicle and GW0742, GW1929, or rIl-4.

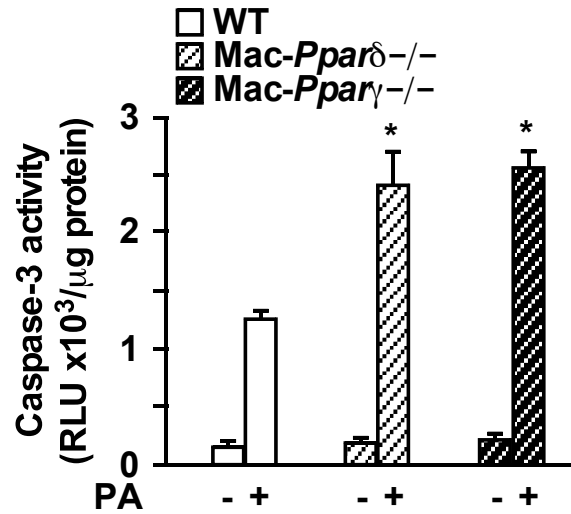

**Figure S2. Macrophages lacking *Ppar*δ or *Ppar*γ are prone to lipotoxicity-triggered cell death.**

WT, Mac-*Ppar*δ<sup>-/-</sup> and Mac-*Ppar*γ<sup>-/-</sup> BMDMs were treated with vehicle or PA (300 μM) for 16 hr and caspase-3 activity was measured by Caspase-Glo® 3/7 Assay kits. Values were expressed as means ± SEM. \*p < 0.05 between WT and Mac-*Ppar*δ<sup>-/-</sup> or Mac-*Ppar*γ<sup>-/-</sup>.

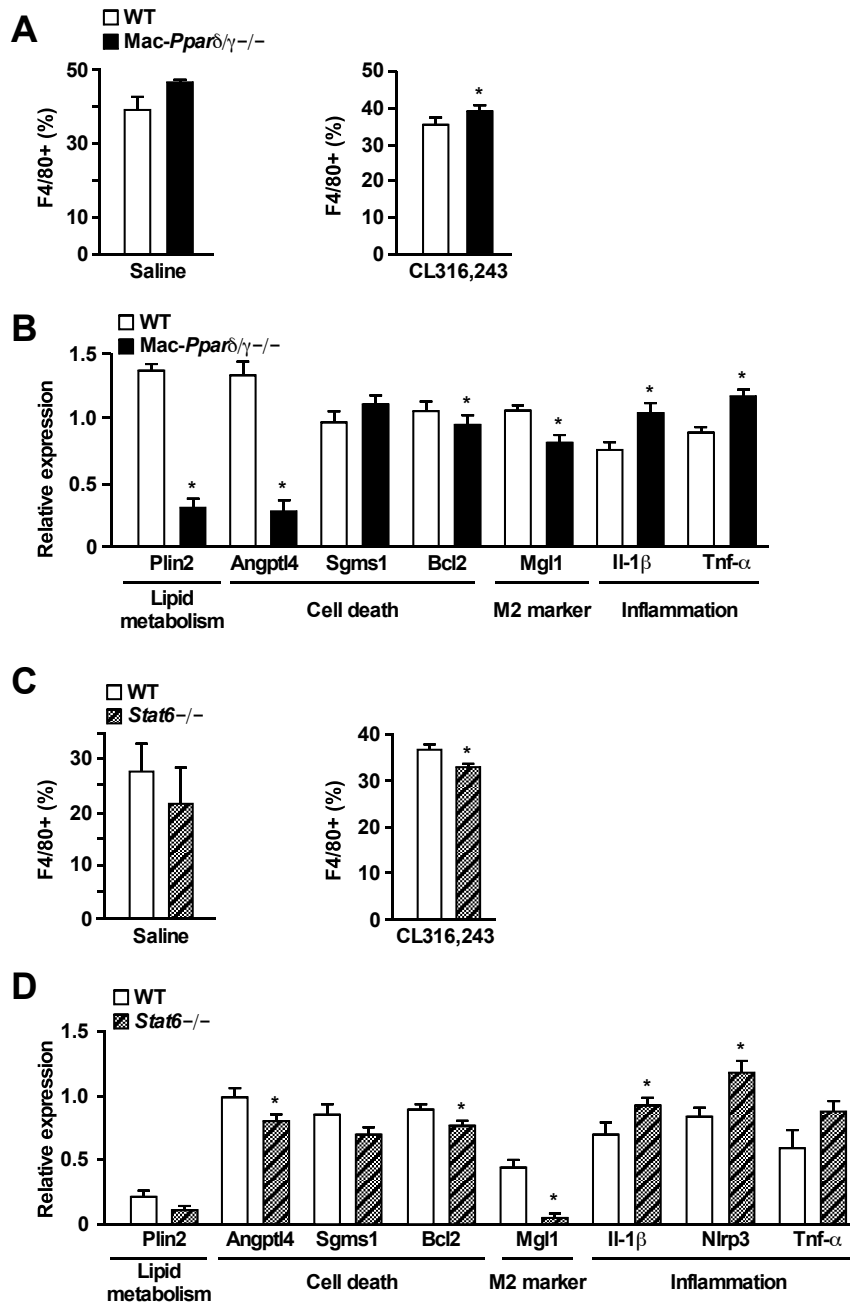

**Figure S3. Assessment of ATMs from WT, Mac-*Ppar* $\delta/\gamma^{-/-}$  and *Stat6* $^{-/-}$  mice.**

Chow-fed WT, Mac-*Ppar* $\delta/\gamma^{-/-}$  and *Stat6* $^{-/-}$  mice (3-month-old males) were fasted for 14 hr, followed by intraperitoneal injection of saline or 1 mg/kg CL316,243. Animals were sacrificed 2.5 hr after injection. SVF and ATMs were isolated from gonadal WAT. (A) and (C) Flow cytometry quantification of the percentage of F4/80<sup>+</sup> cells in SVF of WAT from Mac-*Ppar* $\delta/\gamma^{-/-}$  and *Stat6* $^{-/-}$  mice, respectively. Left and right panels were from saline and CL316,243 injected mice respectively. (B) and (D) Gene expression analyses in ATMs from saline injected Mac-*Ppar* $\delta/\gamma^{-/-}$  and *Stat6* $^{-/-}$  mice. Values were expressed as means  $\pm$  SEM. \**p* < 0.05 between WT and Mac-*Ppar* $\delta/\gamma^{-/-}$  or *Stat6* $^{-/-}$  mice.
